# Supplementary material for: Do Rubber Floor Mats Prevent Lameness in Gestating Sows Housed in Large Groups? A Field Experiment on Three Commercial Farms in France
Source: MDPI journal article supplement (doi:10.3390/ani11113160), 2021-11-05
Supplement: s1 [file s1]

## Do Rubber Floor Mats Prevent Lameness in Gestating Sows Housed in Large Groups? A Field Experiment on Three Commercial Farms in France

Supplementary material S1: Rubber mat's conception

a)

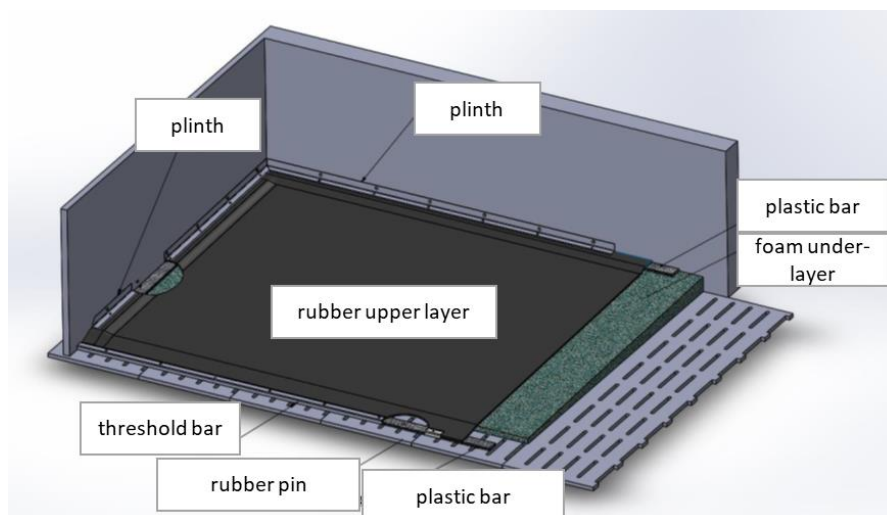

b)

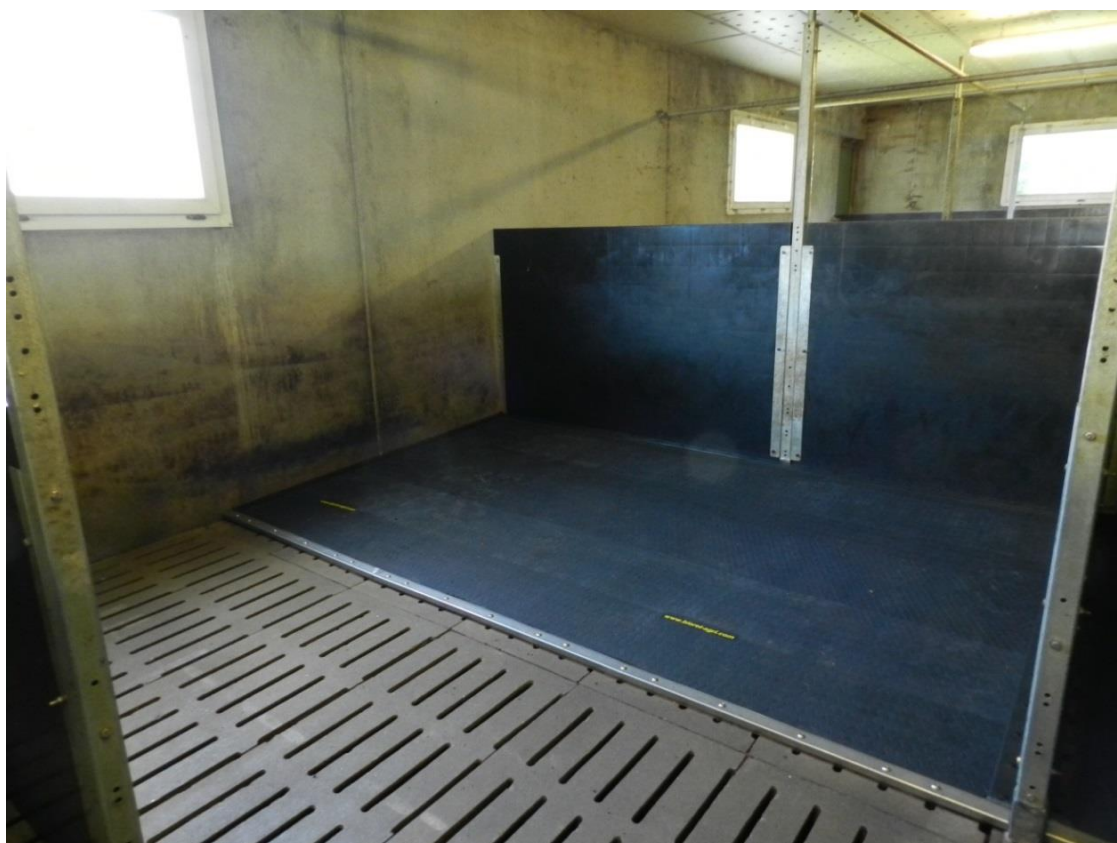

Conception of the rubber mat a) schematic representation of mat's conception, b) mat placed in a lying box
