# Supplementary material for: Do Rubber Floor Mats Prevent Lameness in Gestating Sows Housed in Large Groups? A Field Experiment on Three Commercial Farms in France
Source: MDPI journal article supplement (doi:10.3390/ani11113160), 2021-11-05
Supplement: s1 [file s1]

# Do Rubber Floor Mats Prevent Lameness in Gestating Sows Housed in Large Groups? A Field Experiment on Three Commercial Farms in France

## Results of the GLM models

Table S1: Results of mixed ordinal regression model for lameness

| <i>Predictor</i>                                     | <b>Lameness</b>   |               |                  |
|------------------------------------------------------|-------------------|---------------|------------------|
|                                                      | <i>Odds ratio</i> | <i>CI</i>     | <i>p</i>         |
| No lameness   mild lameness <sup>1</sup>             | 5.05              | 0.67 – 38.27  | 0.12             |
| Mild lameness   severe lameness <sup>1</sup>         | 44.23             | 5.77 – 339.32 | <b>&lt;0.001</b> |
| Rubber mat                                           | 0.50              | 0.13 – 2.01   | 0.33             |
| Control                                              | 1                 |               |                  |
| Middle                                               | 2.13              | 1.60 – 2.84   | <b>&lt;0.001</b> |
| End                                                  | 2.51              | 1.88 – 3.34   | <b>&lt;0.001</b> |
| Beginning                                            | 1                 |               |                  |
| Cycle 2                                              | 1.06              | 0.83 – 1.35   | 0.65             |
| Cycle 1                                              | 1                 |               |                  |
| Parity rank = 1                                      | 0.80              | 0.53 – 1.21   | 0.30             |
| Parity rank >5                                       | 0.74              | 0.43 – 1.26   | 0.26             |
| Parity rank [2-5]                                    | 1                 |               |                  |
| <b>Random Effects</b>                                |                   |               |                  |
| $\tau_{00}^2$ sow(pen:farm)                          | 1.19              |               |                  |
| $\tau_{00}$ pen :farm                                | 1.17              |               |                  |
| $\tau_{00}$ farm                                     | 2.37              |               |                  |
| ICC <sup>3</sup>                                     | 0.59              |               |                  |
| N <sub>sow</sub>                                     | 495               |               |                  |
| N <sub>pen</sub>                                     | 10                |               |                  |
| N <sub>farm</sub>                                    | 3                 |               |                  |
| Observations                                         | 2361              |               |                  |
| Marginal R <sup>2</sup> / Conditional R <sup>2</sup> | 0.035 / 0.604     |               |                  |

<sup>1</sup>Intercept

<sup>2</sup>Standard errors of the random effects

<sup>3</sup>Intra-class correlation

Table S2: Results of the mixed logistic regression models for bursitis and leg injuries

| Predictor                                            | Bursitis*     |             |              | Leg injuries  |              |              |
|------------------------------------------------------|---------------|-------------|--------------|---------------|--------------|--------------|
|                                                      | Odds ratio    | CI          | p            | Odds ratio    | CI           | p            |
| (Intercept)                                          | 0.03          | 0.00 – 7.58 | 0.210        | 0.05          | 0.01 – 0.31  | <b>0.001</b> |
| Rubber mat<br>Control                                |               |             |              | 1.37<br>1     | 0.16 – 11.70 | 0.775        |
| Rubber mat at Te                                     | <b>0.29</b>   | 0.10 – 0.90 | <b>0.032</b> |               |              |              |
| Rubber mat at Tm                                     | 0.72          | 0.24 – 2.15 | 0.552        |               |              |              |
| Rubber mat at Tb                                     | 0.82          | 0.28 – 2.47 | 0.729        |               |              |              |
| Control at Te                                        | 0.82          | 0.54 – 1.24 | 0.355        |               |              |              |
| Control at Tm                                        | 0.72          | 0.48 – 1.09 | 0.119        |               |              |              |
| Control at Tb                                        | 1             |             |              |               |              |              |
| End (Te)<br>Beginning (Tb)                           |               |             |              | 0.55<br>1     | 0.38 – 0.80  | <b>0.002</b> |
| Cycle 2<br>Cycle 1                                   | 0.72<br>1     | 0.55 – 0.94 | <b>0.014</b> | 1.04<br>1     | 0.72 – 1.51  | 0.816        |
| Parity rank = 1                                      | 0.39          | 0.22 – 0.68 | <b>0.001</b> | 0.52          | 0.26 – 1.03  | 0.062        |
| Parity rank >5                                       | 1.09          | 0.63 – 1.87 | 0.767        | 0.82          | 0.52 – 13.0  | 0.401        |
| Parity rank [2–5]                                    | 1             |             |              | 1             |              |              |
| <b>Random Effects</b>                                |               |             |              |               |              |              |
| $\tau_{00}^1$ sow(pen:farm)                          | 1.47          |             |              | 0.15          |              |              |
| $\tau_{00}$ pen :farm                                | 0.38          |             |              | 3.15          |              |              |
| $\tau_{00}$ farm                                     | 19.19         |             |              | 0.30          |              |              |
| ICC <sup>2</sup>                                     | 0.86          |             |              | 0.52          |              |              |
| N sows                                               | 495           |             |              | 576           |              |              |
| N pens                                               | 10            |             |              | 10            |              |              |
| N farms                                              | 3             |             |              | 3             |              |              |
| Observations                                         | 2361          |             |              | 1650          |              |              |
| Marginal R <sup>2</sup> / Conditional R <sup>2</sup> | 0.013 / 0.866 |             |              | 0.026 / 0.535 |              |              |

<sup>1</sup>Standard errors of the random effects<sup>2</sup>Intra-class correlation

\*The model includes a significant Treatment\*Visit interaction

Table S3: Results of the mixed ordinal regression models for claw growth defects and claw erosion

| <i>Predictor</i>                                     | <b>Claw defects</b> |              |                  | <b>Erosion</b>    |             |                  |
|------------------------------------------------------|---------------------|--------------|------------------|-------------------|-------------|------------------|
|                                                      | <i>Odds ratio</i>   | <i>CI</i>    | <i>p</i>         | <i>Odds ratio</i> | <i>CI</i>   | <i>p</i>         |
| Absence mild <sup>1</sup>                            | 0.79                | 0.19 – 3.30  | 0.742            | 0.06              | 0.03 – 0.14 | <b>&lt;0.001</b> |
| Mild Severe <sup>1</sup>                             | 14.08               | 3.31 – 59.84 | <b>&lt;0.001</b> | 4.11              | 1.86 – 9.09 | <b>&lt;0.001</b> |
| Rubber mat<br>Control                                | 0.92<br>1           | 0.67 – 1.25  | 0.588            | 0.65<br>1         | 0.24 – 1.81 | 0.413            |
| End (Te)<br>Beginning (Tb)                           | 1.26<br>1           | 1.01 – 1.57  | <b>0.037</b>     | 1.67<br>1         | 1.34 – 2.09 | <b>&lt;0.001</b> |
| Cycle 1<br>Cycle 2                                   | 1.58<br>1           | 1.26 – 1.98  | <b>&lt;0.001</b> | 1.00<br>1         | 0.80 – 1.25 | 0.968            |
| Parity rank = 1                                      | 0.11                | 0.07 – 0.18  | <b>&lt;0.001</b> | 0.51              | 0.35 – 0.75 | <b>0.001</b>     |
| Parity rank >5                                       | 2.41                | 1.67 – 3.50  | <b>&lt;0.001</b> | 1.33              | 0.96 – 1.83 | 0.086            |
| Parity rank [2–5]                                    | 1                   |              |                  | 1                 |             |                  |
| <b>Random Effects</b>                                |                     |              |                  |                   |             |                  |
| $\tau_{00}^2$ sow(pen:farm)                          | 1.70                |              |                  | 0.87              |             |                  |
| $\tau_{00}$ pen :farm                                | 0.28                |              |                  | 0.27              |             |                  |
| $\tau_{00}$ farm                                     | 1.53                |              |                  | 0.51              |             |                  |
| ICC <sup>3</sup>                                     | 0.49                |              |                  | 0.33              |             |                  |
| N sows                                               | 576                 |              |                  | 576               |             |                  |
| N pens                                               | 10                  |              |                  | 10                |             |                  |
| N farms                                              | 3                   |              |                  | 3                 |             |                  |
| Observations                                         | 1650                |              |                  | 1650              |             |                  |
| Marginal R <sup>2</sup> / Conditional R <sup>2</sup> | 0.207 / 0.541       |              |                  | 0.051 / 0.354     |             |                  |

<sup>1</sup>Intercept<sup>2</sup>Standard errors of the random effects<sup>3</sup>Intra-class correlation

Table S4: Results of the GLM models for body condition measures

| Predictor                   | Scratches  |              |                  | Cleanliness* |               |                  | Thin       |             |                  | Fat        |             |              |
|-----------------------------|------------|--------------|------------------|--------------|---------------|------------------|------------|-------------|------------------|------------|-------------|--------------|
|                             | Odds ratio | CI           | p                | Odds ratio   | CI            | p                | Odds ratio | CI          | p                | Odds ratio | CI          | p            |
| (Intercept)                 | 0.13       | 0.04 – 0.40  | <b>&lt;0.001</b> |              |               |                  | 0.01       | 0.01 – 0.04 | <b>&lt;0.001</b> | 0.12       | 0.02 – 0.97 | <b>0.046</b> |
| (Intercept)                 |            |              |                  |              |               |                  |            |             |                  |            |             |              |
| Clean to dirty              |            |              |                  | 4.55         | 3.04 – 6.81   | <b>&lt;0.001</b> |            |             |                  |            |             |              |
| Dirty to very dirty         |            |              |                  | 43.07        | 27.63 – 67.13 | <b>&lt;0.001</b> |            |             |                  |            |             |              |
| Clean                       |            |              |                  | 1            |               |                  |            |             |                  |            |             |              |
| Rubber Mat                  | 0.74       | 0.19 – 2.87  | 0.659            |              |               |                  | 0.52       | 0.26 – 1.06 | 0.072            | 1.25       | 0.47 – 3.33 | 0.652        |
| Control                     | 1          |              |                  |              |               |                  | 1          |             |                  | 1          |             |              |
| Middle (Tm)                 | 7.77       | 5.76 – 10.49 | <b>&lt;0.001</b> |              |               |                  | 1.54       | 0.88 – 2.68 | 0.132            | 0.85       | 0.63 – 1.15 | 0.289        |
| End (Te)                    | 5.17       | 3.85 – 6.93  | <b>&lt;0.001</b> |              |               |                  | 1.54       | 0.88 – 2.69 | 0.133            | 1.09       | 0.81 – 1.46 | 0.577        |
| Beginning (Tb)              | 1          |              |                  |              |               |                  |            |             |                  |            |             |              |
| Cycle 2                     | 0.52       | 0.42 – 0.66  | <b>&lt;0.001</b> | 1.03         | 0.85 – 1.25   | 0.745            | 0.43       | 0.26 – 0.72 | <b>0.001</b>     | 0.83       | 0.64 – 1.09 | 0.178        |
| Cycle 1                     | 1          |              |                  | 1            |               |                  | 1          |             |                  | 1          |             |              |
| Parity rank = 1             | 1.10       | 0.77 – 1.57  | 0.608            | 1.66         | 1.25 – 2.20   | <b>&lt;0.001</b> | 0.35       | 0.12 – 1.00 | 0.051            | 0.65       | 0.38 – 1.09 | 0.099        |
| Parity rank >5              | 0.74       | 0.50 – 1.11  | 0.151            | 0.70         | 0.49 – 0.99   | <b>0.047</b>     | 0.84       | 0.32 – 2.22 | 0.724            | 1.29       | 0.70 – 2.38 | 0.408        |
| Parity rank [2–5]           | 1          |              |                  | 1            |               |                  | 1          |             |                  | 1          |             |              |
| Rubber mat at Te            |            |              |                  | 29.27        | 16.96 – 50.49 | <b>&lt;0.001</b> |            |             |                  |            |             |              |
| Rubber mat at Tm            |            |              |                  | 5.14         | 3.03 – 8.71   | <b>&lt;0.001</b> |            |             |                  |            |             |              |
| Rubber mat at Tb            |            |              |                  | 0.57         | 0.32 – 1.01   | 0.055            |            |             |                  |            |             |              |
| Control at Te               |            |              |                  | 6.62         | 4.78 – 9.17   | <b>&lt;0.001</b> |            |             |                  |            |             |              |
| Control at Tm               |            |              |                  | 1.12         | 0.79 – 1.58   | 0.534            |            |             |                  |            |             |              |
| Control at Tb               |            |              |                  | 1            |               |                  |            |             |                  |            |             |              |
| <b>Random Effects</b>       |            |              |                  |              |               |                  |            |             |                  |            |             |              |
| $\tau_{00}^1$ sow(pen:farm) | 0.60       |              |                  | 0.39         |               |                  | 4.69       |             |                  | 2.34       |             |              |
| $\tau_{00}$ pen :farm       | 1.15       |              |                  | 0.10         |               |                  | 0.04       |             |                  | 0.52       |             |              |
| $\tau_{00}$ farm            | 0.23       |              |                  | 0.00         |               |                  | 0.00       |             |                  | 2.94       |             |              |
| ICC <sup>2</sup>            | 0.38       |              |                  |              |               |                  | 0.59       |             |                  | 0.64       |             |              |

|                                                      |               |            |               |               |
|------------------------------------------------------|---------------|------------|---------------|---------------|
| N sows                                               | 495           | 495        | 495           | 495           |
| N pens                                               | 10            | 10         | 10            | 10            |
| N farms                                              | 3             | 3          | 3             | 3             |
| Observations                                         | 2361          | 2360       | 2353          | 2353          |
| Marginal R <sup>2</sup> / Conditional R <sup>2</sup> | 0.149 / 0.469 | 0.364 / NA | 0.054 / 0.612 | 0.007 / 0.641 |

<sup>1</sup>Standard errors of the random effects

<sup>2</sup>Intra-class correlation

\*Mixed ordinal regression model including a significant Treatment\*Visit interaction

Table S5: Results of the GLM models for reproductive performance traits

|                                                      | Number of piglets born |                 |        | Number of piglets born alive |     |        | Number of weaned piglets |     |        |
|------------------------------------------------------|------------------------|-----------------|--------|------------------------------|-----|--------|--------------------------|-----|--------|
| Predictors                                           | LSM <sup>1</sup>       | SE <sup>2</sup> | p      | LSM                          | SE  | p      | LSM                      | SE  | p      |
| (Intercept)                                          | 16.1                   | 0.7             | <0.001 | 15.6                         | 0.5 | <0.001 | 12.8                     | 0.4 | <0.001 |
| Rubber mat                                           | 15.0                   | 0.6             | 0.28   | 14.1                         | 0.4 | 0.20   | 12.2                     | 0.3 | 0.34   |
| Control                                              | 15.6                   | 0.6             |        | 14.7                         | 0.4 |        | 12.4                     | 0.3 |        |
| Cycle 1                                              | 15.3                   | 0.6             | 0.87   | 14.6                         | 0.4 | 0.292  | 12.6 a                   | 0.4 | <0.001 |
| Cycle 2                                              | 15.4                   | 0.4             |        | 14.3                         | 0.3 |        | 12.0 b                   | 0.3 |        |
| Parity rank = 1                                      | 14.6                   | 0.6 a           | 0.01   | 14.1a                        | 0.4 | 0.001  | 12.8 a                   | 0.4 | <0.001 |
| Parity rank [2–5]                                    | 15.8                   | 0.6 b           |        | 15.2b                        | 0.4 |        | 12.4 a                   | 0.3 |        |
| Parity rank >5                                       | 15.6                   | 0.5 ab          |        | 14.0a                        | 0.4 |        | 11.7 b                   | 0.3 |        |
| Random Effects                                       |                        |                 |        |                              |     |        |                          |     |        |
| τ <sub>00</sub> <sup>4</sup> <sub>pen :farm</sub>    | 0.50                   |                 |        | 0.34                         |     |        | 0.04                     |     |        |
| τ <sub>00</sub> <sub>farm</sub>                      | 0.19                   |                 |        | 0.00                         |     |        | 0.21                     |     |        |
| ICC <sup>5</sup>                                     | 0.03                   |                 |        | 0.03                         |     |        | 0.06                     |     |        |
| N pen                                                | 10                     |                 |        | 10                           |     |        | 10                       |     |        |
| N farm                                               | 3                      |                 |        | 3                            |     |        | 3                        |     |        |
| Observations                                         | 801                    |                 |        | 786                          |     |        | 791                      |     |        |
| Marginal R <sup>2</sup> / Conditional R <sup>2</sup> | 0.014 / 0.046          |                 |        | 0.029 / 0.054                |     |        | 0.046 / 0.099            |     |        |

<sup>1</sup>Least square mean<sup>2</sup>Standard error<sup>3</sup>Means with different subscripts are different at p < 0.05 (Tukey adjustment)<sup>4</sup>Standard errors of random effects<sup>5</sup>Intra-class correlation
